# Supplementary material
Source: ML conference proceedings conference paper supplement (https://proceedings.mlr.press/v139/xu21d.html)
Supplement: Supplementary file 3 [file xu21d-supp.zip]

Archive with 49 entries (44 files):
- supplement_material/
- supplement_material/.DS_Store
- __MACOSX/supplement_material/._.DS_Store
- supplement_material/Appendix.pdf
- __MACOSX/supplement_material/._Appendix.pdf
- supplement_material/implementation/
- __MACOSX/supplement_material/._implementation
- supplement_material/implementation/.DS_Store
- __MACOSX/supplement_material/implementation/._.DS_Store
- supplement_material/implementation/requirements.txt
- __MACOSX/supplement_material/implementation/._requirements.txt
- supplement_material/implementation/code/
- __MACOSX/supplement_material/implementation/._code
- supplement_material/implementation/README.md
- __MACOSX/supplement_material/implementation/._README.md
- supplement_material/implementation/data/
- __MACOSX/supplement_material/implementation/._data
- supplement_material/implementation/code/inductive_fit.py
- __MACOSX/supplement_material/implementation/code/._inductive_fit.py
- supplement_material/implementation/code/inductive_weight.py
- __MACOSX/supplement_material/implementation/code/._inductive_weight.py
- supplement_material/implementation/code/models.py
- __MACOSX/supplement_material/implementation/code/._models.py
- supplement_material/implementation/code/preprocess.py
- __MACOSX/supplement_material/implementation/code/._preprocess.py
- supplement_material/implementation/code/transductive_preprocess.py
- __MACOSX/supplement_material/implementation/code/._transductive_preprocess.py
- supplement_material/implementation/code/transductive_train.py
- __MACOSX/supplement_material/implementation/code/._transductive_train.py
- supplement_material/implementation/code/ranking_eval.py
- __MACOSX/supplement_material/implementation/code/._ranking_eval.py
- supplement_material/implementation/code/__pycache__/
- __MACOSX/supplement_material/implementation/code/.___pycache__
- supplement_material/implementation/code/nuc_svm_vs_MF.py
- __MACOSX/supplement_material/implementation/code/._nuc_svm_vs_MF.py
- supplement_material/implementation/code/utils.py
- __MACOSX/supplement_material/implementation/code/._utils.py
- supplement_material/implementation/code/kernel_vs_CF.py
- __MACOSX/supplement_material/implementation/code/._kernel_vs_CF.py
- supplement_material/implementation/code/inductive_exp.py
- __MACOSX/supplement_material/implementation/code/._inductive_exp.py
- supplement_material/implementation/data/ml-100k.zip
- __MACOSX/supplement_material/implementation/data/._ml-100k.zip
- supplement_material/implementation/code/__pycache__/utils.cpython-38.pyc
- __MACOSX/supplement_material/implementation/code/__pycache__/._utils.cpython-38.pyc
- supplement_material/implementation/code/__pycache__/models.cpython-38.pyc
- __MACOSX/supplement_material/implementation/code/__pycache__/._models.cpython-38.pyc
- supplement_material/implementation/code/__pycache__/ranking_eval.cpython-38.pyc
- __MACOSX/supplement_material/implementation/code/__pycache__/._ranking_eval.cpython-38.pyc
