# Supplementary material
Source: ML conference proceedings conference paper supplement (https://proceedings.mlr.press/v139/xu21d.html)
Supplement: Supplementary file 3 [file xu21d-supp.zip › supplement_material/implementation/requirements.txt]

numpy==1.19.5
pandas==1.2.1
tqdm==4.56.0
tensorflow==2.2.0
cvxpy==1.1.7
matplotlib==3.3.4
scikit_learn==0.24.1
